# Supplementary material for: Characterization of Collagens Fibers (I, III, IV) and Elastin of Normal and Neoplastic Canine Prostatic Tissues
Source: Preprints.org preprint supplement (doi:10.20944/preprints201901.0082.v3), 2019-02-21
Supplement: Supplementary file 1 [file supplementary]

**Supplementary Table S2.** Histological type of 10 canine prostatic carcinomas, according to Eble et al., 2004 and Palmieri et al., 2014.

| **Histologic Type** | | **Case Number** |
| --- | --- | --- |
| **Single histological pattern** | |  |
|  | Cribriform with comedonecrosis | 14, 16 |
|  | Solid | 12, 18 |
|  | Small acinar/ductual | 9, 10 |
| **Mixed histological patterns** | |  |
|  | Solid, cribriform with comedonecrosis | 11, 17 |
|  | Cribriform with comedonecrosis, solid | 13 |
|  | Cribriform with comedonecrosis, cribriform without comedonecrosis | 15 |
